# Supplementary material
Source: PubMed Central journal article supplement (PMC6616604)
Supplement: 12264_2019_357_MOESM1_ESM.pdf [file 12264_2019_357_MOESM1_ESM.pdf]

Supplementary Materials

**Spontaneous Regional Brain Activity in Healthy Individuals is Nonlinearly Modulated by the Interaction of *ZNF804A* rs1344706 and *COMT* rs4680 Polymorphisms**

Lingling Cui, Fei Wang, Miao Chang, Zhiyang Yin, Guoguang Fan, Yanzhuo Song, Yange Wei, Yixiao Xu, Yifan Zhang, Yanqing Tang, Xiaohong Gong, Ke Xu

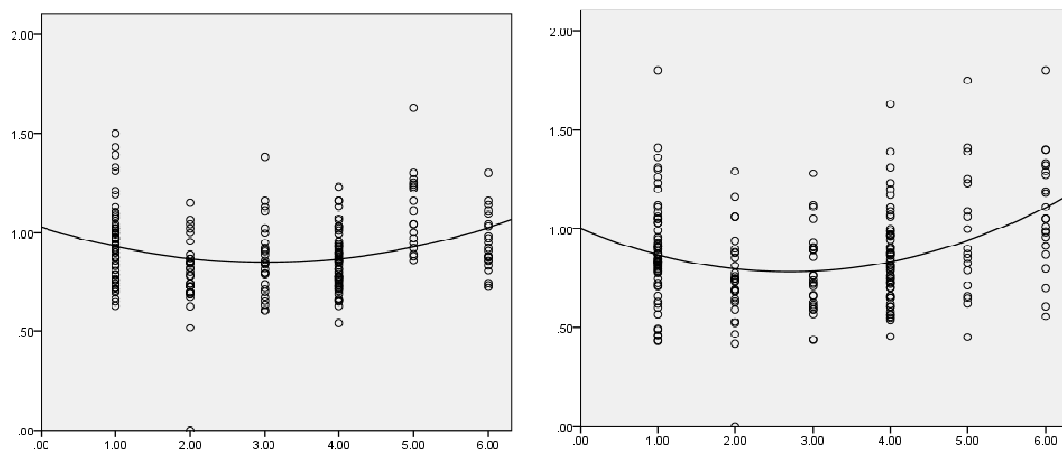

Fig. S1. By sorting according to *COMT*, the quadratic regression was significant (Right:  $r^2 = 0.068$ ,  $P = 0.001$ ; Left:  $r^2 = 0.115$ ,  $P < 0.001$ )
